# Supplementary material for: Stroke in Young Adults in Spain: Epidemiology and Risk Factors by Age
Source: MDPI journal article supplement (doi:10.3390/jpm13050768), 2023-04-29
Supplement: s1 [file s1]

## SUPPLEMENTARY MATERIAL

**Table S1.** ICD10 codes used to identify vascular risk factors and comorbidities as secondary diagnosis in each case included in the Spanish Minimum Basic Hospital Discharge Dataset.

| Condition                           | ICD10 codes (including subgroups) |
|-------------------------------------|-----------------------------------|
| Arterial hypertension               | I10                               |
| Diabetes mellitus                   | E10, E11                          |
| Dyslipidaemia                       | E78                               |
| Smoking (current or former)         | Z72.0; Z87.891; F17               |
| Cocaine                             | F14; T40.5- T40.5X5S              |
| Cannabis                            | F1; T40.7- T40.7X5S               |
| Enolism                             | F10                               |
| Obesity                             | E66                               |
| Migraine                            | G43                               |
| Hypothyroidism                      | E03                               |
| Hyperthyroidism                     | E05.5 – E05.91                    |
| Cancer                              | C00-C96                           |
| Ischemic heart disease              | I20; I25                          |
| Atrial fibrillation                 | I48                               |
| Non-congenital cardiopathy (all)    | I42                               |
| Dilated cardiomyopathy              | I42.0                             |
| Heart failure                       | I13; I50                          |
| Valvulopathy (non-rheumatic)        | I34; I35; I36; I37                |
| Valvulopathy (rheumatic)            | I05; I06; I07; I08; I09           |
| PFO                                 | Q21.1                             |
| Chronic renal failure               | I12; N18                          |
| COPD                                | J44                               |
| OSAH                                | G47.3                             |
| Intracranial atherosclerosis, n (%) | I67.2                             |
| Fibromuscular dysplasia, n (%)      | I77.3                             |
| Arterial dissection (intracranial)  | I67.0                             |
| Arterial dissection (carotid)       | I77.71                            |
| Arterial dissection (vertebral)     | I77.74                            |
| Thrombophilia                       | D68.5-D68.9                       |
| Antiphospholipid syndrome, n (%)    | D68.61; D68.62                    |
| Systemic vasculitis (all)           | M31                               |
| Moyamoya disease                    | I67.5                             |

|                                |                |
|--------------------------------|----------------|
| Sick cell disease, n (%)       | D57.0-D57.819  |
| Fabry disease                  | E75.21         |
| Endocarditis                   | I33            |
| Cardiac prosthesis infection   | T82.7          |
| Brain herniation, n (%)        | G93.5          |
| Seizures, n (%)                | G40.909; R56.9 |
| Acute coronary syndrome n (%)  | I21            |
| Urinary tract infection, n (%) | N39.0          |
| Acute renal failure, n (%)     | N17            |
| Broncoaspiration               | J69            |
| Pneumonia                      | J18            |

PFO: Patent foramen oval, COPD: Chronic obstructive pulmonary disease; OSAH: Obstructive sleep apnea-hypopnea syndrome.

**Table S2.** Demographic and clinical characteristics by age range

| Variable                                                    | ALL ISCHEMIC STROKE PATIENTS |                |                |                 |                 |                 |                 |                  |                  |                  |                  |                  |                  |
|-------------------------------------------------------------|------------------------------|----------------|----------------|-----------------|-----------------|-----------------|-----------------|------------------|------------------|------------------|------------------|------------------|------------------|
|                                                             | 18-24<br>N=163               | 25-29<br>N=274 | 30-34<br>N=573 | 35-39<br>N=1230 | 40-44<br>N=2485 | 45-49<br>N=4437 | 50-54<br>N=7332 | 55-59<br>N=10846 | 60-64<br>N=13561 | 65-69<br>N=17271 | 70-74<br>N=21928 | 75-79<br>N=25155 | >= 80<br>N=81232 |
| Demographic data<br>vascular risk factors and comorbidities |                              |                |                |                 |                 |                 |                 |                  |                  |                  |                  |                  |                  |
| Male, n (%)                                                 | 81 (49.7%)                   | 134 (48.9%)    | 300 (52.4%)    | 773 (62.8%)     | 1593 (64.1%)    | 2993 (67.5%)    | 5290 (72.1%)    | 8014 (73.9%)     | 9699 (71.5%)     | 11556 (66.9%)    | 13332 (60.8%)    | 13607 (54.1%)    | 32036 (39.4%)    |
| Arterial hypertension, n (%)                                | 8 (4.9%)                     | 16 (5.8%)      | 55 (9.6%)      | 216 (17.6%)     | 695 (28%)       | 1746 (39.4%)    | 3481 (47.5%)    | 5623 (51.8%)     | 7482 (55.2%)     | 10064 (58.3%)    | 13110 (59.8%)    | 15006 (59.3%)    | 45461 (56%)      |
| Diabetes mellitus, n (%)                                    | 2 (1.2%)                     | 3 (1.1%)       | 14 (2.4%)      | 58 (4.7%)       | 222 (8.9%)      | 665 (15%)       | 1530 (20.9%)    | 3003 (27.7%)     | 4364 (32.2%)     | 6048 (35%)       | 8025 (36.6%)     | 9013 (35.8%)     | 24610 (30.3%)    |
| Dyslipidaemia, n (%)                                        | 4 (2.5%)                     | 21 (7.7%)      | 69 (12%)       | 251 (20.4%)     | 627 (25.2%)     | 1445 (32.6%)    | 2918 (39.9%)    | 4704 (43.4%)     | 6117 (45.1%)     | 8150 (47.2%)     | 10319 (47.5%)    | 11457 (45.5%)    | 30054 (37%)      |
| Smoking, n (%)                                              | 43 (26.4%)                   | 103 (37.6%)    | 239 (41.7%)    | 543 (44.1%)     | 1151 (46.3%)    | 2329 (52.2%)    | 4262 (58.1%)    | 6206 (57.2%)     | 6770 (49.9%)     | 6865 (39.7%)     | 6538 (29.8%)     | 5251 (20.9%)     | 8157 (10%)       |
| Cocaine, n (%)                                              | 10 (6.1%)                    | 24 (8.8%)      | 45 (7.9%)      | 85 (6.9%)       | 134 (5.4%)      | 183 (4.1%)      | 170 (2.3%)      | 112 (1%)         | 56 (0.4%)        | 36 (0.2%)        | 7 (0%)           | 3 (0%)           | 0 (0%)           |
| Cannabis, n (%)                                             | 14 (8.6%)                    | 33 (12%)       | 45 (7.9%)      | 84 (6.8%)       | 98 (3.9%)       | 124 (2.8%)      | 150 (2%)        | 122 (1.1%)       | 54 (0.4%)        | 34 (0.2%)        | 9 (0%)           | 2 (0%)           | 3 (0%)           |
| Enolism, n (%)                                              | 4 (2.5%)                     | 12 (4.4%)      | 29 (5.1%)      | 80 (6.5%)       | 241 (9.7%)      | 498 (11.2%)     | 1074 (14.6%)    | 1738 (16%)       | 1945 (14.3%)     | 2021 (11.7%)     | 1676 (7.6%)      | 1207 (4.8%)      | 1248 (1.5%)      |
| Cancer diagnosis, n (%)                                     | 0 (0%)                       | 3 (1.1%)       | 3 (0.5%)       | 18 (1.5%)       | 38 (1.5%)       | 81 (1.8%)       | 195 (2.7%)      | 424 (3.9%)       | 659 (4.9%)       | 872 (5%)         | 1197 (5.5%)      | 1318 (5.2%)      | 3623 (4.5%)      |
| Obesity, n (%)                                              | 12 (7.4%)                    | 16 (5.8%)      | 32 (5.6%)      | 131 (10.7%)     | 290 (11.7%)     | 626 (14.1%)     | 951 (13%)       | 1325 (12.2%)     | 1491 (11%)       | 1944 (11.3%)     | 2037 (9.3%)      | 2003 (8%)        | 4002 (4.9%)      |
| Ischemic heart disease, n (%)                               | 4 (2.5%)                     | 11 (4%)        | 18 (3.1%)      | 51 (4.1%)       | 124 (5%)        | 250 (5.6%)      | 484 (6.6%)      | 903 (8.3%)       | 1258 (9.3%)      | 1849 (10.7%)     | 2523 (11.5%)     | 3009 (12%)       | 9403 (11.6%)     |
| Atrial fibrillation, n (%)                                  | 2 (1.2%)                     | 3 (1.1%)       | 12 (2.1%)      | 24 (2%)         | 104 (4.2%)      | 201 (4.5%)      | 420 (5.7%)      | 997 (9.2%)       | 1910 (14.1%)     | 3320 (19.2%)     | 5543 (25.3%)     | 7912 (31.5%)     | 33977 (41.8%)    |
| Non-congenital cardiomyopathy, n (%)                        | 1 (0.6%)                     | 10 (3.6%)      | 17 (3%)        | 34 (2.8%)       | 51 (2.1%)       | 127 (2.9%)      | 205 (2.8%)      | 307 (2.8%)       | 334 (2.5%)       | 452 (2.6%)       | 492 (2.2%)       | 549 (2.2%)       | 1339 (1.6%)      |
| Dilated cardiomyopathy, n (%)                               | 0 (0%)                       | 4 (1.5%)       | 7 (1.2%)       | 15 (1.2%)       | 26 (1%)         | 62 (1.4%)       | 110 (1.5%)      | 151 (1.4%)       | 172 (1.3%)       | 227 (1.3%)       | 233 (1.1%)       | 278 (1.1%)       | 598 (0.7%)       |
| Heart failure, n (%)                                        | 0 (0%)                       | 0 (0%)         | 7 (1.2%)       | 9 (0.7%)        | 26 (1%)         | 61 (1.4%)       | 121 (1.7%)      | 240 (2.2%)       | 360 (2.7%)       | 503 (2.9%)       | 835 (3.8%)       | 1265 (5%)        | 7397 (9.1%)      |
| Valvulopathy (non-rheumatic), n (%)                         | 1 (0.6%)                     | 1 (0.4%)       | 6 (1%)         | 10 (0.8%)       | 19 (0.8%)       | 50 (1.1%)       | 59 (0.8%)       | 122 (1.1%)       | 189 (1.4%)       | 400 (2.3%)       | 644 (2.9%)       | 930 (3.7%)       | 3789 (4.7%)      |
| Valvulopathy (rheumatic), n (%)                             | 0 (0%)                       | 3 (1.1%)       | 7 (1.2%)       | 18 (1.5%)       | 32 (1.3%)       | 44 (1%)         | 86 (1.2%)       | 148 (1.4%)       | 249 (1.8%)       | 395 (2.3%)       | 567 (2.6%)       | 763 (3%)         | 2834 (3.5%)      |
| PFO, n (%)                                                  | 41 (25.2%)                   | 60 (21.9%)     | 96 (16.8%)     | 167 (13.6%)     | 268 (10.8%)     | 312 (7%)        | 292 (4%)        | 271 (2.5%)       | 150 (1.1%)       | 185 (1.1%)       | 146 (0.7%)       | 109 (0.4%)       | 127 (0.2%)       |
| OSA, n (%)                                                  | 1 (0.6%)                     | 0 (0%)         | 10 (1.7%)      | 30 (1.7%)       | 95 (3.8%)       | 230 (5.2%)      | 428 (5.8%)      | 693 (6.4%)       | 863 (6.4%)       | 1160 (6.7%)      | 1365 (6.2%)      | 1226 (4.9%)      | 1861 (2.3%)      |
| Intracranial atherosclerosis, n (%)                         | 1 (0.6%)                     | 2 (0.7%)       | 3 (0.5%)       | 11 (0.9%)       | 46 (1.9%)       | 92 (2.1%)       | 274 (3.7%)      | 448 (4.1%)       | 588 (4.3%)       | 734 (4.2%)       | 964 (4.4%)       | 1083 (4.3%)      | 3074 (3.8%)      |
| Unusual causes                                              |                              |                |                |                 |                 |                 |                 |                  |                  |                  |                  |                  |                  |
| Fibromuscular dysplasia, n (%)                              | 2 (1.2%)                     | 0 (0%)         | 0 (0%)         | 0 (0%)          | 2 (0.2%)        | 5 (0.2%)        | 6 (0.1%)        | 5 (0.1%)         | 5 (0%)           | 0 (0%)           | 3 (0%)           | 3 (0%)           | 3 (0%)           |
| Arterial dissection (all), n (%)                            | 10 (6.1%)                    | 10 (3.6%)      | 29 (5.1%)      | 90 (7.3%)       | 118 (4.7%)      | 144 (3.2%)      | 176 (2.4%)      | 107 (1%)         | 89 (0.7%)        | 62 (0.4%)        | 53 (0.2%)        | 44 (0.2%)        | 56 (0.1%)        |
| Arterial dissection intracranial), n (%)                    | 1 (0.6%)                     | 1 (0.4%)       | 3 (0.5%)       | 13 (1.1%)       | 9 (0.4%)        | 5 (0.1%)        | 10 (0.1%)       | 7 (0.1%)         | 9 (0.1%)         | 4 (0%)           | 4 (0%)           | 4 (0%)           | 7 (0%)           |
| Arterial dissection (carotid), n (%)                        | 5 (3.1%)                     | 4 (1.5%)       | 10 (1.7%)      | 42 (3.4%)       | 60 (2.4%)       | 101 (2.3%)      | 130 (1.8%)      | 71 (0.7%)        | 63 (0.5%)        | 44 (0.3%)        | 31 (0.1%)        | 25 (0.1%)        | 33 (0%)          |
| Arterial dissection (vertebral), n (%)                      | 5 (3.1%)                     | 5 (1.8%)       | 18 (3.1%)      | 35 (2.8%)       | 50 (2%)         | 38 (0.9%)       | 40 (0.5%)       | 29 (0.3%)        | 19 (0.1%)        | 14 (0.1%)        | 18 (0.1%)        | 15 (0.1%)        | 16 (0%)          |
| Thrombophilia, n (%)                                        | 12 (7.4%)                    | 14 (5.1%)      | 23 (4%)        | 27 (2.2%)       | 76 (3.1%)       | 109 (2.5%)      | 117 (1.6%)      | 137 (1.3%)       | 114 (0.8%)       | 111 (0.6%)       | 98 (0.4%)        | 90 (0.4%)        | 183 (0.2%)       |
| Vasospasm, n (%)                                            | 1 (0.6%)                     | 3 (1.1%)       | 3 (0.5%)       | 1 (0.1%)        | 5 (0.2%)        | 7 (0.2%)        | 9 (0.1%)        | 12 (0.1%)        | 8 (0.1%)         | 9 (0.1%)         | 3 (0%)           | 13 (0.1%)        | 14 (0%)          |
| Arteritis, n (%)                                            | 0 (0%)                       | 1 (0.4%)       | 2 (0.3%)       | 2 (0.2%)        | 4 (0.2%)        | 4 (0.1%)        | 6 (0.1%)        | 9 (0.1%)         | 7 (0%)           | 7 (0%)           | 5 (0%)           | 10 (0%)          | 15 (0%)          |
| Systemic lupus erythematosus , n (%)                        | 2 (1.2%)                     | 2 (0.7%)       | 8 (1.4%)       | 9 (0.7%)        | 20 (0.8%)       | 24 (0.5%)       | 13 (0.2%)       | 28 (0.3%)        | 25 (0.2%)        | 22 (0.1%)        | 24 (0.1%)        | 19 (0.1%)        | 31 (0%)          |
| Endocarditis, n (%)                                         | 0 (0%)                       | 1 (0.4%)       | 1 (0.2%)       | 1 (0.1%)        | 9 (0.4%)        | 4 (0.1%)        | 8 (0.1%)        | 18 (0.2%)        | 20 (0.1%)        | 22 (0.1%)        | 27 (0.1%)        | 32 (0.1%)        | 61 (0.1%)        |
| Outcome                                                     |                              |                |                |                 |                 |                 |                 |                  |                  |                  |                  |                  |                  |
| In-hospital mortality, n (%)                                | 3 (1.8%)                     | 4 (1.5%)       | 14 (2.4%)      | 31 (2.5%)       | 77 (3.1%)       | 124 (2.8%)      | 278 (3.8%)      | 498 (4.6%)       | 770 (5.7%)       | 1071 (6.2%)      | 1766 (8.1%)      | 2517 (10%)       | 16410 (20.2%)    |

PFO: Patent foramen oval, COPD: Chronic obstructive pulmonary disease; OSAH: Obstructive sleep apnea-hypopnea syndrome.

**Table S3.** Demographic and clinical characteristics of the included patients by sex and age group.

| Variable                                                         | All patients     |                    |         | 18-50 y.o.      |                   |       | > 50 y.o.    |               |         |
|------------------------------------------------------------------|------------------|--------------------|---------|-----------------|-------------------|-------|--------------|---------------|---------|
|                                                                  | Men<br>(N=99408) | Women<br>(n=87079) | p       | Men<br>(N=5874) | Women<br>(n=3288) | p     | Men<br>(N=)  | Women<br>(n=) | p       |
| <b>Demographic data, vascular risk factors and comorbidities</b> |                  |                    |         |                 |                   |       |              |               |         |
| Mean age (SD), years                                             | 71.6 (13.1)      | 78.4 (12.8)        | < 0.001 | 43.03 (5.7)     | 41.7 (6.74)       | 0.000 | 73.36 (11.2) | 79.79 (10.6)  | < 0.001 |
| Arterial hypertension, n (%)                                     | 53540 (53.9)     | 49423 (56.8)       | < 0.001 | 1941 (33%)      | 795 (24.2)        | 0.000 | 51599 (55.2) | 48628 (58%)   | < 0.001 |
| Diabetes mellitus, n (%)                                         | 31971 (32.2)     | 25586 (29.4)       | < 0.001 | 707 (12%)       | 257 (7.8%)        | 0.000 | 31264 (33.4) | 25329 (30.2)  | < 0.001 |
| Dyslipidaemia, n (%)                                             | 40898 (41.1)     | 35238 (40.5)       | 0.003   | 1772 (30.2)     | 645 (19.6)        | 0.000 | 39126 (41.8) | 34593 (41.3)  | 0.02    |
| Smoking, n (%)                                                   | 39953 (40.2)     | 8504 (9.8%)        | < 0.001 | 3016 (51.3)     | 1392 (42.3)       | 0.000 | 36937 (39.5) | 7112 (8.5%)   | < 0.001 |
| Cannabis, n (%)                                                  | 683 (0.7%)       | 89 (0.1%)          | < 0.001 | 334 (5.7%)      | 64 (1.9%)         | 0.000 | 349 (0.4%)   | 25 (0%)       | < 0.001 |
| Cocaine, n (%)                                                   | 764 (0.8%)       | 101 (0.1%)         | < 0.001 | 411 (7%)        | 70 (2.1%)         | 0.000 | 353 (0.4%)   | 31 (0%)       | < 0.001 |
| Enolism, n (%)                                                   | 10806 (10.9)     | 967 (1.1%)         | < 0.001 | 763 (13%)       | 101 (3.1%)        | 0.000 | 10043 (10.7) | 866 (1%)      | < 0.001 |
| Hypothyroidism, n (%)                                            | 2417 (2.4%)      | 7814 (9%)          | < 0.001 | 100 (1.7%)      | 229 (7%)          | 0.000 | 2317 (2.5%)  | 7585 (9.1%)   | < 0.001 |
| Hyperthyroidism, n (%)                                           | 463 (0.5%)       | 1053 (1.2%)        | < 0.001 | 29 (0.5%)       | 34 (1%)           | 0.003 | 434 (0.5%)   | 1019 (1.2%)   | < 0.001 |
| Cancer diagnosis, n (%)                                          | 5393 (5.4%)      | 3038 (3.5%)        | < 0.001 | 65 (1.1%)       | 78 (2.4%)         | 0.000 | 5328 (5.7%)  | 2960 (3.5%)   | < 0.001 |
| Obesity, n (%)                                                   | 7167 (7.2%)      | 7693 (8.8%)        | < 0.001 | 672 (11.4%)     | 435 (13.2)        | 0.012 | 6495 (6.9%)  | 7258 (8.7%)   | < 0.001 |
| Ischemic heart disease, n (%)                                    | 13159 (13.2)     | 6728 (7.7%)        | < 0.001 | 316 (5.4%)      | 142 (4.3%)        | 0.025 | 12843 (13.7) | 6586 (7.9%)   | < 0.001 |
| Atrial fibrillation, n (%)                                       | 23869 (24%)      | 30556 (35.1)       | < 0.001 | 252 (4.3%)      | 95 (2.9%)         | 0.001 | 23618 (25.3) | 30461 (36.4)  | < 0.001 |
| Non-congenic cardiomyopathy, n (%)                               | 2622 (2.6%)      | 1296 (1.5%)        | < 0.001 | 185 (3.1%)      | 55 (1.7%)         | 0.000 | 2437 (2.6%)  | 1241 (1.5%)   | < 0.001 |
| Dilated cardiomyopathy, n (%)                                    | 1411 (1.4%)      | 472 (0.5%)         | < 0.001 | 96 (1.6%)       | 18 (0.5%)         | 0.000 | 1315 (1.4%)  | 454 (0.5%)    | < 0.001 |
| Enolic cardiomyopathy, n (%)                                     | 153 (0.2%)       | 7 (0%)             | < 0.001 | 14 (0.2%)       | 0 (0%)            | 0.005 | 139 (0.1%)   | 7 (0%)        | < 0.001 |
| Heart failure, n (%)                                             | 4413 (4.4%)      | 6411 (7.4%)        | < 0.001 | 74 (1.3%)       | 29 (0.9%)         | 0.10  | 4339 (4.6%)  | 6382 (7.6%)   | < 0.001 |
| Valvulopathy (all), n (%)                                        | 4726 (4.8%)      | 6233 (7.2%)        | < 0.001 | 101 (1.7%)      | 84 (2.6%)         | 0.006 | 4625 (4.9%)  | 6149 (7.3%)   | < 0.001 |
| Valvulopathy (non-rheumatic), n (%)                              | 3055 (3.1%)      | 3165 (3.6%)        | < 0.001 | 52 (0.9%)       | 35 (1.1%)         | 0.39  | 3003 (3.2%)  | 3130 (3.7%)   | < 0.001 |
| Valvulopathy (rheumatic), n (%)                                  | 1823 (1.8%)      | 3323 (3.8%)        | < 0.001 | 51 (0.9%)       | 53 (1.6%)         | 0.001 | 1772 (1.9%)  | 3270 (3.9%)   | < 0.001 |
| PFO, n (%)                                                       | 1293 (1.3%)      | 931 (1.1%)         | < 0.001 | 562 (9.6%)      | 382 (11.6%)       | 0.002 | 731 (0.8%)   | 549 (0.7%)    | 0.002   |
| Chronic renal failure, n (%)                                     | 10219 (10.3)     | 10002 (11.5)       | < 0.001 | 156 (2.7%)      | 52 (1.6%)         | 0.001 | 10063 (10.8) | 9950 (11.9%)  | < 0.001 |
| COPD, n (%)                                                      | 8629 (8.7%)      | 1926 (2.2%)        | < 0.001 | 36 (0.6%)       | 19 (0.6%)         | 0.835 | 8593 (9.2%)  | 1907 (2.3%)   | < 0.001 |
| OSA, n (%)                                                       | 5873 (5.9%)      | 2089 (2.4%)        | < 0.001 | 318 (5.4%)      | 48 (1.5%)         | 0.000 | 5555 (5.9%)  | 2041 (2.4%)   | < 0.001 |
| Intracranial atherosclerosis, n (%)                              | 4216 (4.2%)      | 3104 (3.6%)        | < 0.001 | 122 (2.1%)      | 33 (1%)           | 0.000 | 4094 (4.4%)  | 3071 (3.7%)   | < 0.001 |
| <b>Unusual causes</b>                                            |                  |                    |         |                 |                   |       |              |               |         |
| Fibromuscular dysplasia, n (%)                                   | 14 (0%)          | 22 (0%)            | 0.08    | 6 (0.1%)        | 8 (0.2%)          | 0.097 | 8 (0%)       | 14 (0%)       | 0.124   |
| Arterial dissection (all), n (%)                                 | 706 (0.7%)       | 282 (0.3%)         | <0.001  | 279 (4.7%)      | 122 (3.7%)        | 0.020 | 427 (0.5%)   | 160 (0.2%)    | < 0.001 |
| Arterial dissection intracranial), n (%)                         | 48 (0%)          | 29 (0%)            | 0.11    | 23 (0.4%)       | 9 (0.3%)          | 0.359 | 25 (0%)      | 20 (0%)       | 0.706   |
| Arterial dissection (carotid), n (%)                             | 441 (0.4%)       | 178 (0.2%)         | <0.001  | 148 (2.5%)      | 74 (2.3%)         | 0.422 | 293 (0.3%)   | 104 (0.1%)    | < 0.001 |
| Arterial dissection (vertebral), n (%)                           | 223 (0.2%)       | 79 (0.1%)          | <0.001  | 110 (1.9%)      | 41 (1.2%)         | 0.024 | 113 (0.1%)   | 38 (0%)       | < 0.001 |
| Thrombophilia, n (%)                                             | 603 (0.6%)       | 508 (0.6%)         | 0.516   | 127 (2.2%)      | 134 (4.1%)        | 0.000 | 476 (0.5%)   | 374 (0.4%)    | 0.057   |
| Vasospasm, n (%)                                                 | 42 (0%)          | 46 (0.1%)          | 0.29    | 7 (0.1%)        | 13 (0.4%)         | 0.007 | 35 (0%)      | 33 (0%)       | 0.833   |
| Systemic vasculitis (all), n (%)                                 | 157 (0.2%)       | 201 (0.2%)         | <0.001  | 11 (0.2%)       | 14 (0.4%)         | 0.036 | 146 (0.2%)   | 187 (0.2%)    | 0.001   |
| Moyamoya disease, n (%)                                          | 15 (0%)          | 17 (0%)            | 0.466   | 4 (0.1%)        | 9 (0.3%)          | 0.012 | 11 (0%)      | 8 (0%)        | 0.653   |
| Sick cell disease, n (%)                                         | 6 (0%)           | 11 (0%)            | 0.137   | 2 (0%)          | 6 (0.2%)          | 0.021 | 4 (0%)       | 5 (0%)        | 0.618   |
| Endocarditis, n (%)                                              | 116 (0.1%)       | 88 (0.1%)          | 0.308   | 10 (0.2%)       | 6 (0.2%)          | 0.893 | 106 (0.1%)   | 82 (0.1%)     | 0.318   |
| Cardiac prosthesis infection, n (%)                              | 178 (0.2%)       | 157 (0.2%)         | 0.950   | 9 (0.2%)        | 15 (0.5%)         | 0.006 | 169 (0.2%)   | 142 (0.2%)    | 0.573   |
| <b>In-hospital complications</b>                                 |                  |                    |         |                 |                   |       |              |               |         |
| Brain herniation, n (%)                                          | 494 (0.5%)       | 559 (0.6%)         | <0.001  | 49 (0.8%)       | 38 (1.2%)         | 0.128 | 445 (0.5%)   | 521 (0.6%)    | < 0.001 |
| Seizures, n (%)                                                  | 546 (0.5%)       | 641 (0.7%)         | <0.001  | 25 (0.4%)       | 21 (0.6%)         | 0.166 | 521 (0.6%)   | 620 (0.7%)    | < 0.001 |
| Acute coronary syndrome n (%)                                    | 428 (0.4%)       | 351 (0.4%)         | 0.359   | 14 (0.2%)       | 12 (0.4%)         | 0.274 | 414 (0.4%)   | 339 (0.4%)    | 0.219   |
| Urinary tract infection, n (%)                                   | 4124 (4.1%)      | 9474 (10.9%)       | <0.001  | 89 (1.5%)       | 118 (3.6%)        | 0.000 | 4035 (4.3%)  | 9356 (11.2%)  | < 0.001 |
| Acute renal failure, n (%)                                       | 3524 (3.5%)      | 3210 (3.7%)        | 0.103   | 75 (1.3%)       | 20 (0.6%)         | 0.002 | 3449 (3.7%)  | 3190 (3.8%)   | 0.185   |
| Broncoaspiration, n (%)                                          | 3880 (3.9%)      | 3813 (4.4%)        | <0.001  | 63 (1.1%)       | 21 (0.6%)         | 0.037 | 3817 (4.1%)  | 3792 (4.5%)   | < 0.001 |

|                              |                  |                  |        |               |           |       |                 |                  |        |
|------------------------------|------------------|------------------|--------|---------------|-----------|-------|-----------------|------------------|--------|
| Pneumonia, n (%)             | 1387<br>(1.4%)   | 1112<br>(1.3%)   | 0.027  | 25 (0.4%)     | 9 (0.3%)  | 0.251 | 1362<br>(1.5%)  | 1103<br>(1.3%)   | 0.012  |
| Outcome                      |                  |                  |        |               |           |       |                 |                  |        |
| In-hospital mortality, n (%) | 10133<br>(10.2%) | 13430<br>(15.4%) | <0.001 | 168<br>(2.9%) | 85 (2.6%) | 0.441 | 9965<br>(10.7%) | 13345<br>(15.9%) | <0.001 |

PFO: Patent foramen oval, COPD: Chronic obstructive pulmonary disease; OSAH: Obstructive sleep apnea-hypopnea syndrome.

**Table S4.** Prevalence of vascular risk factors in general population by sex and age group (health survey 2014).

|                         | ≥ 18 (all)      |                 |                  | 18-50 (young)   |                 |                 | > 50 (old)      |                 |                 |
|-------------------------|-----------------|-----------------|------------------|-----------------|-----------------|-----------------|-----------------|-----------------|-----------------|
| Comorbidity, n (%)      | All<br>(22321)  | Men<br>(10297)  | Women<br>(12024) | All<br>(10669)  | Men<br>(5224)   | Women<br>(5445) | All<br>(11652)  | Men<br>(5073)   | Women<br>(6579) |
| HBP                     | 6023<br>(27%)   | 2675<br>(26%)   | 3348<br>(27.8%)  | 911<br>(8.5%)   | 514<br>(9.8%)   | 397<br>(7.3%)   | 5112<br>(43.9%) | 2161<br>(42.6%) | 2951<br>(44.9%) |
| Dyslipidemia            | 5166<br>(23.2%) | 2310<br>(22.5%) | 2856<br>(23.8%)  | 1026<br>(9.6%)  | 650<br>(12.5%)  | 376<br>(6.9%)   | 4140<br>(35.6%) | 1660<br>(32.9%) | 2480<br>(37.8%) |
| Diabetes Mellitus       | 1956<br>(8.8%)  | 942<br>(9.2%)   | 1014<br>(8.4%)   | 191<br>(1.8%)   | 103<br>(2%)     | 88<br>(1.6%)    | 1765<br>(15.2%) | 839<br>(16.6%)  | 926<br>(14.1%)  |
| Smoking                 | 4787<br>(21.4%) | 2629<br>(25.5%) | 2158<br>(17.9%)  | 3096<br>(29%)   | 1705<br>(32.6%) | 1391<br>(25.5%) | 1691<br>(14.5%) | 924<br>(18.2%)  | 767<br>(11.7%)  |
| Excessive enolic intake | 8195<br>(36.7%) | 5304<br>(51.5%) | 2891<br>(24%)    | 3891<br>(36.5%) | 2470<br>(47.3%) | 1421<br>(26.1%) | 4304<br>(36.9%) | 2834<br>(55.9%) | 1470<br>(22.3%) |
| Obesity (BMI > 30)      | 2794<br>(13.7%) | 1299<br>(13.6%) | 1495<br>(13.8%)  | 943<br>(9.3%)   | 516<br>(10.4%)  | 427<br>(8.3%)   | 1851<br>(18%)   | 783<br>(17.1%)  | 1068<br>(18.7%) |
| Ischemic heart disease  | 929<br>(4.2%)   | 580<br>(5.6%)   | 349<br>(2.9%)    | 60<br>(0.6%)    | 44<br>(0.8%)    | 16<br>(0.3%)    | 869<br>(7.5%)   | 536<br>(10.6%)  | 333<br>(5.1%)   |
